# Supplementary material for: Latitudinal distribution of biomarkers across the western Arctic Ocean and the Bering Sea: an approach to assess sympagic and pelagic algal production
Source: Copernicus journal article supplement (doi:10.5194/bg-2023-143), 2023-09-01
Supplement: Supplementary file 1 [file bg-2023-143-supplement.pdf]

*Supplement of*

**Latitudinal distribution of biomarkers across the western Arctic Ocean and the Bering Sea: an approach to assess sympagic and pelagic algal production**

5 **Youcheng Bai et al.**

*Corresponding to:* Jianfang Chen (jfchen@sio.org.cn)

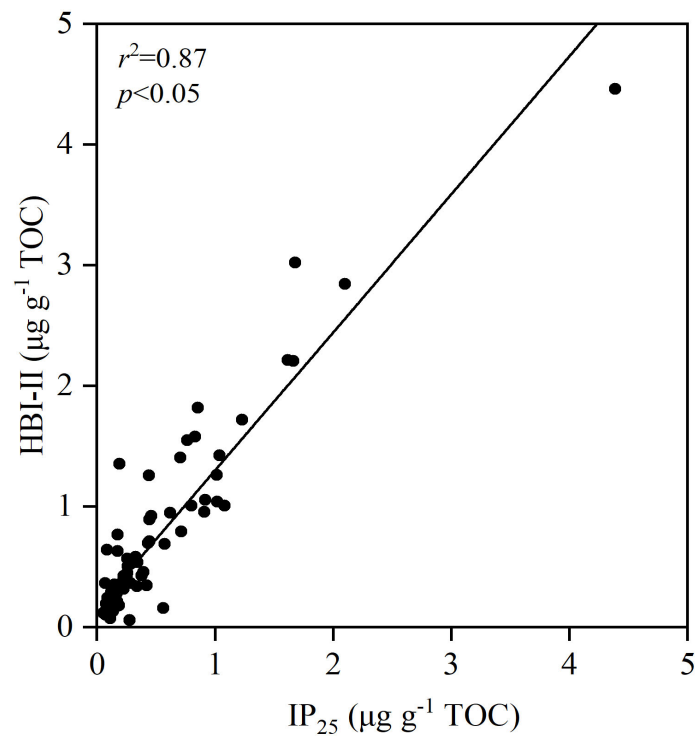

**Figure S1.** Cross-plot and correlations calculated between the concentrations of IP<sub>25</sub> and HBI-II in surface sediments (n=88).

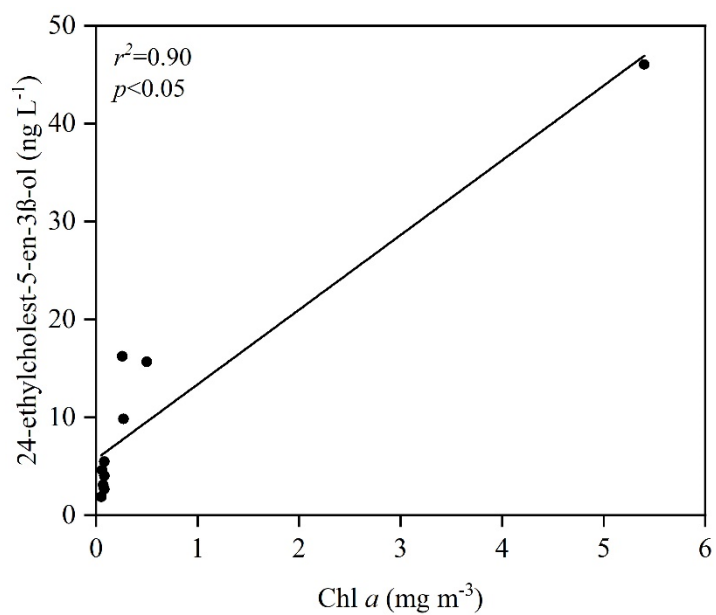

10

**Figure S2.** Cross-plots and correlation calculated between 24-ethylcholest-5-en-3β-ol and Chl *a* in SPM from the Chukchi Sea.

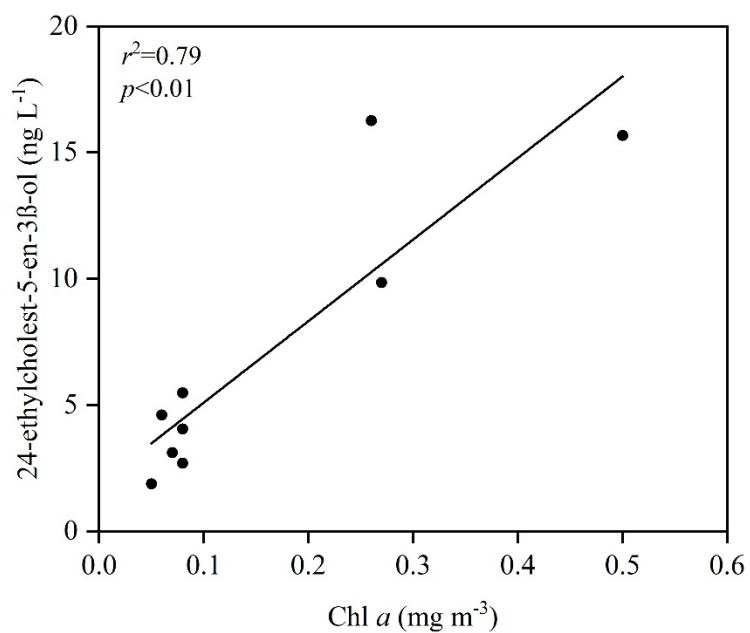

15 **Figure S3.** Cross-plot and correlation calculated between 24-ethylcholest-5-en-3β-ol and Chl *a* in SPM after removing the highest value.

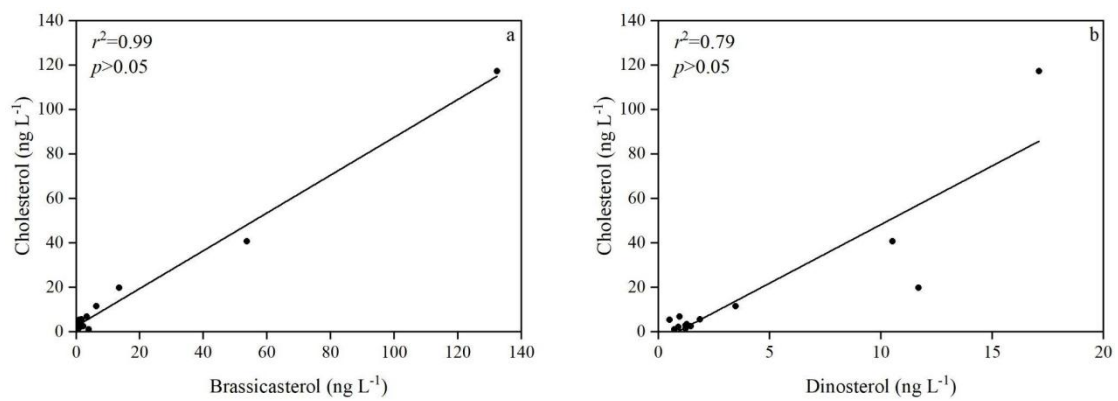

**Figure S4.** Cross-plots and correlation calculated between (a) cholesterol and brassicasterol and between (b) cholesterol and dinosterol in SPM.

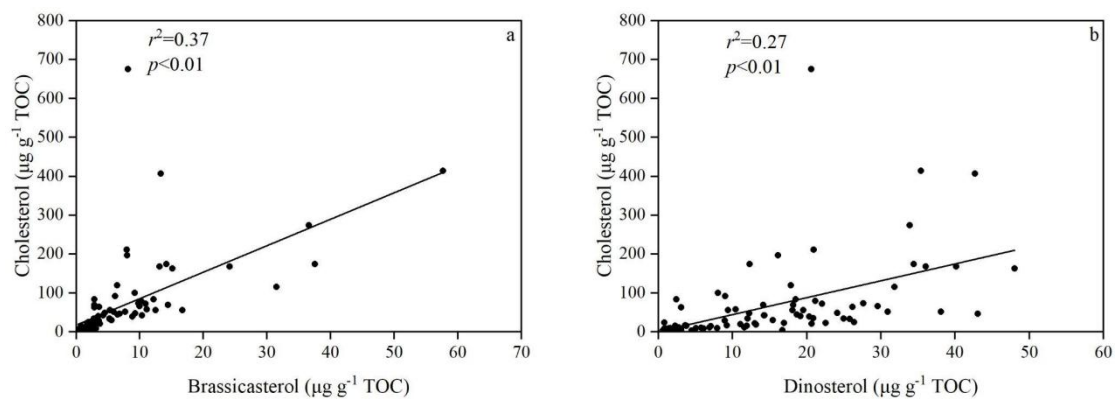

20 **Figure S5.** Cross-plots and correlation calculated between (a) cholesterol and brassicasterol, and between (b) cholesterol and dinosterol in the surface sediments of the compiled dataset ( $n=88$ )

23 **Table S1.** List of sample locations where surface sediments and suspended particulate matter (SPM) were collected. Bulk parameters of sediments and Chlorophyll *a*  
 24 of SPM are also indicated.

| Nr. | Cruise | Sample name | Lati. | Long.  | Water Depth (m) | TOC (%) | TN (%) | Chlorophyll <i>a</i> (mg m <sup>-3</sup> ) | Pigment fucoxanthin (ng L <sup>-1</sup> ) <sup>a</sup> | Reference  |
|-----|--------|-------------|-------|--------|-----------------|---------|--------|--------------------------------------------|--------------------------------------------------------|------------|
| 1   | ARC04  | 10B04       | 54.59 | 171.40 | 3873            | 0.53    | 0.09   | —                                          | —                                                      | This study |
| 2   | ARC04  | 10B06       | 57.01 | 174.49 | 3780            | 1.92    | 0.23   | —                                          | —                                                      | This study |
| 3   | ARC03  | 08BR07      | 60.08 | 180.01 | 2571            | 1.49    | 0.20   | —                                          | —                                                      | This study |
| 4   | ARC06  | 14NB02      | 60.87 | 184.47 | 107             | 1.82    | 0.23   | —                                          | —                                                      | This study |
| 5   | ARC04  | 10NB01      | 61.23 | 184.92 | 92              | 1.70    | 0.24   | —                                          | —                                                      | This study |
| 6   | ARC04  | 10BB01      | 61.29 | 182.52 | 130             | 0.85    | 0.12   | —                                          | —                                                      | This study |
| 7   | ARC04  | 10NB02      | 61.38 | 186.31 | 76              | 1.40    | 0.18   | —                                          | —                                                      | This study |
| 8   | ARC03  | 08NB19      | 61.50 | 191.99 | 23              | 0.23    | 0.03   | —                                          | —                                                      | This study |
| 9   | ARC04  | 10NB03      | 61.51 | 187.80 | 61              | 1.22    | 0.18   | —                                          | —                                                      | This study |
| 10  | ARC03  | 08BR14      | 61.70 | 184.30 | 90              | 2.01    | 0.29   | —                                          | —                                                      | This study |
| 11  | ARC03  | 08NB17      | 61.83 | 190.00 | 36              | 0.43    | 0.06   | —                                          | —                                                      | This study |
| 12  | ARC06  | 14B14       | 61.93 | 183.60 | 101             | 1.27    | 0.18   | —                                          | —                                                      | This study |
| 13  | ARC03  | 08NB28      | 62.02 | 191.97 | 27              | 0.10    | 0.01   | —                                          | —                                                      | This study |
| 14  | ARC03  | 08NB26      | 62.43 | 189.90 | 34              | 0.23    | 0.03   | —                                          | —                                                      | This study |
| 15  | ARC06  | 14B15       | 62.54 | 184.69 | 79              | 1.26    | 0.16   | —                                          | —                                                      | This study |
| 16  | ARC04  | 10BB05      | 62.54 | 184.67 | 79              | 1.47    | 0.20   | —                                          | —                                                      | This study |
| 17  | ARC03  | 08NB13      | 62.57 | 186.43 | 60              | 1.64    | 0.18   | —                                          | —                                                      | This study |
| 18  | ARC04  | 10NB08      | 62.66 | 192.66 | 35              | 0.47    | 0.06   | —                                          | —                                                      | This study |
| 19  | ARC05  | 12BM04      | 62.70 | 186.08 | 63              | 1.02    | 0.15   | —                                          | —                                                      | This study |

25

**Table S1 (continued)**

| Nr. | Cruise | Sample name | Lati. | Long.  | Water Depth (m) | TOC (%) | TN (%) | Chlorophyll <i>a</i> (mg m <sup>-3</sup> ) | Pigment fucoxanthin (ng L <sup>-1</sup> ) <sup>a</sup> | Reference  |
|-----|--------|-------------|-------|--------|-----------------|---------|--------|--------------------------------------------|--------------------------------------------------------|------------|
| 20  | ARC03  | 08NB11      | 62.88 | 185.47 | 69              | 1.59    | 0.23   | —                                          | —                                                      | This study |
| 21  | ARC03  | 08NB22      | 63.11 | 186.88 | 63              | 1.23    | 0.17   | —                                          | —                                                      | This study |
| 22  | ARC03  | 08NB21      | 63.94 | 187.59 | 50              | 0.57    | 0.08   | —                                          | —                                                      | This study |
| 23  | ARC03  | 08BS07      | 64.33 | 191.50 | 33              | 0.18    | 0.02   | —                                          | —                                                      | This study |
| 24  | ARC04  | 10SR01      | 67.00 | 191.03 | 49              | 0.43    | 0.06   | —                                          | —                                                      | This study |
| 25  | ARC04  | 10SR05      | 69.00 | 191.00 | 54              | 1.98    | 0.22   | —                                          | —                                                      | This study |
| 26  | ARC04  | 10R06       | 69.50 | 191.02 | 52              | 1.33    | 0.17   | —                                          | —                                                      | This study |
| 27  | ARC03  | 08C23       | 70.50 | 194.00 | 39              | 0.70    | 0.09   | —                                          | —                                                      | This study |
| 28  | ARC03  | 08C25       | 70.50 | 195.97 | 37              | 0.47    | 0.06   | —                                          | —                                                      | This study |
| 29  | ARC06  | 14C05       | 70.76 | 195.27 | 33              | 0.10    | n.a.   | —                                          | —                                                      | This study |
| 30  | ARC04  | 10R08       | 71.00 | 191.02 | 44              | 1.32    | 0.17   | —                                          | —                                                      | This study |
| 31  | ARC04  | 10C04       | 71.01 | 192.97 | 46              | 0.96    | 0.12   | —                                          | —                                                      | This study |
| 32  | ARC04  | 10S21       | 71.62 | 205.28 | 46              | 1.58    | 0.16   | —                                          | —                                                      | This study |
| 33  | ARC04  | 10C09       | 71.81 | 200.29 | 50              | 1.54    | 0.20   | —                                          | —                                                      | This study |
| 34  | ARC04  | 10S23       | 71.93 | 206.24 | 338             | 1.91    | 0.20   | —                                          | —                                                      | This study |
| 35  | ARC04  | 10R09       | 71.96 | 191.06 | 51              | 1.40    | 0.19   | —                                          | —                                                      | This study |
| 36  | ARC04  | 10S25       | 72.34 | 207.50 | 2830            | 2.19    | 0.21   | —                                          | —                                                      | This study |
| 37  | ARC04  | 10C07       | 72.54 | 194.67 | 51              | 1.74    | 0.24   | —                                          | —                                                      | This study |
| 38  | ARC04  | 10S26       | 72.70 | 206.45 | 3521            | 1.17    | 0.16   | —                                          | —                                                      | This study |
| 39  | ARC04  | 10SR10      | 73.00 | 191.00 | 77              | 2.02    | 0.29   | —                                          | —                                                      | This study |
| 40  | ARC04  | 10MS01      | 73.17 | 205.29 | 3814            | 0.97    | 0.14   | —                                          | —                                                      | This study |



**Table S1 (continued)**

| Nr. | Cruise | Sample name | Lati. | Long.  | Water Depth (m) | TOC (%) | TN (%) | Chlorophyll <i>a</i> (mg m <sup>-3</sup> ) | Pigment fucoxanthin (ng L <sup>-1</sup> ) <sup>a</sup> | Reference         |
|-----|--------|-------------|-------|--------|-----------------|---------|--------|--------------------------------------------|--------------------------------------------------------|-------------------|
| 41  | ARC04  | 10SR12      | 74.50 | 191.00 | 187             | 1.83    | 0.20   | —                                          | —                                                      | This study        |
| 42  | ARC03  | 08B12       | 75.01 | 197.97 | 2013            | 0.56    | 0.15   | —                                          | —                                                      | This study        |
| 43  | ARC03  | 08P31       | 78.00 | 191.99 | 434             | 0.18    | 0.07   | —                                          | —                                                      | This study        |
| 44  | ARC04  | 10BN03      | 78.50 | 201.10 | 2790            | 0.47    | 0.06   | —                                          | —                                                      | This study        |
| 45  | ARC04  | 10BN04      | 79.47 | 200.96 | 3476            | 0.53    | 0.11   | —                                          | —                                                      | This study        |
| 46  | ARC03  | 08N01       | 79.83 | 190.00 | 3341            | 0.32    | 0.09   | —                                          | —                                                      | This study        |
| 47  | ARC06  | 14SIC03     | 81.08 | 202.34 | 3634            | 0.53    | n.a.   | —                                          | —                                                      | This study        |
| 48  | ARC04  | 10BN06      | 81.46 | 195.06 | 3566            | 0.47    | 0.09   | —                                          | —                                                      | This study        |
| 49  | ARC03  | 08B82       | 81.98 | 212.73 | 3387            | 0.38    | n.a.   | —                                          | —                                                      | This study        |
| 50  | ARC04  | 10BN07      | 82.48 | 193.53 | 3627            | 1.08    | 0.13   | —                                          | —                                                      | This study        |
| 51  | ARC03  | 08B85B      | 85.13 | 212.94 | 2079            | 0.22    | 0.05   | —                                          | —                                                      | This study        |
| 52  | ARC03  | 08B86       | 85.40 | 212.51 | 2376            | 0.28    | 0.07   | —                                          | —                                                      | This study        |
| 53  | ARC03  | 08R01       | 67.00 | 191.00 | 42              | 0.73    | 0.10   | —                                          | —                                                      | Bai et al. (2019) |
| 54  | ARC06  | 14CC2       | 67.90 | 191.76 | 58              | 0.53    | n.a.   | —                                          | —                                                      | Bai et al. (2019) |
| 55  | ARC03  | 08R03       | 68.00 | 190.98 | 51              | 1.68    | 0.25   | —                                          | —                                                      | Bai et al. (2019) |
| 56  | ARC06  | 14CC3       | 68.10 | 192.10 | 53              | 0.38    | n.a.   | —                                          | —                                                      | Bai et al. (2019) |
| 57  | ARC06  | 14CC4       | 68.13 | 192.49 | 49              | 0.58    | n.a.   | —                                          | —                                                      | Bai et al. (2019) |
| 58  | ARC05  | 12CC6       | 68.19 | 192.69 | 36              | 1.58    | 0.13   | —                                          | —                                                      | Bai et al. (2019) |
| 59  | ARC06  | 14CC6       | 68.24 | 192.87 | 42              | 0.60    | n.a.   | —                                          | —                                                      | Bai et al. (2019) |
| 60  | ARC06  | 14R03       | 68.62 | 191.00 | 54              | 1.11    | n.a.   | —                                          | —                                                      | Bai et al. (2019) |
| 61  | ARC03  | 08C35       | 68.92 | 193.49 | 28              | 1.55    | 0.16   | —                                          | —                                                      | Bai et al. (2019) |

**Table S1 (continued)**

| Nr. | Cruise | Sample name | Lati. | Long.  | Water Depth (m) | TOC (%) | TN (%) | Chlorophyll <i>a</i> (mg m <sup>-3</sup> ) | Pigment fucoxanthin (ng L <sup>-1</sup> ) <sup>a</sup> | Reference         |
|-----|--------|-------------|-------|--------|-----------------|---------|--------|--------------------------------------------|--------------------------------------------------------|-------------------|
| 62  | ARC03  | 08C33       | 68.92 | 192.49 | 41              | 1.17    | 0.14   | —                                          | —                                                      | Bai et al. (2019) |
| 63  | ARC06  | 14C03       | 69.03 | 193.52 | 33              | 1.06    | n.a.   | —                                          | —                                                      | Bai et al. (2019) |
| 64  | ARC06  | 14C01       | 69.22 | 191.86 | 50              | 0.89    | n.a.   | —                                          | —                                                      | Bai et al. (2019) |
| 65  | ARC03  | 08R09       | 70.99 | 191.03 | 37              | 1.33    | 0.17   | —                                          | —                                                      | Bai et al. (2019) |
| 66  | ARC06  | 14C04       | 71.01 | 193.01 | 45              | 1.28    | n.a.   | —                                          | —                                                      | Bai et al. (2019) |
| 67  | ARC03  | 08C19       | 71.45 | 200.02 | 42              | 1.19    | 0.16   | —                                          | —                                                      | Bai et al. (2019) |
| 68  | ARC03  | 08C17       | 71.49 | 198.02 | 41              | 1.49    | 0.19   | —                                          | —                                                      | Bai et al. (2019) |
| 69  | ARC06  | 14S01       | 71.62 | 202.07 | 63              | 1.07    | n.a.   | —                                          | —                                                      | Bai et al. (2019) |
| 70  | ARC03  | 08C13       | 71.80 | 193.25 | 38              | 1.45    | 0.19   | —                                          | —                                                      | Bai et al. (2019) |
| 71  | ARC06  | 14S02       | 71.92 | 202.54 | 73              | 1.72    | n.a.   | —                                          | —                                                      | Bai et al. (2019) |
| 72  | ARC03  | 08R11       | 72.00 | 191.02 | 47              | 1.71    | 0.24   | —                                          | —                                                      | Bai et al. (2019) |
| 73  | ARC06  | 14S03       | 72.24 | 202.92 | 169             | 1.75    | n.a.   | —                                          | —                                                      | Bai et al. (2019) |
| 74  | ARC03  | 08S13       | 72.94 | 201.68 | 1430            | 1.08    | 0.15   | —                                          | —                                                      | Bai et al. (2019) |
| 75  | ARC06  | 14R07       | 73.00 | 191.03 | 73              | 1.47    | n.a.   | —                                          | —                                                      | Bai et al. (2019) |
| 76  | ARC03  | 08S14       | 73.17 | 202.08 | 2517            | 1.27    | 0.19   | —                                          | —                                                      | Bai et al. (2019) |
| 77  | ARC03  | 08R15       | 73.99 | 190.99 | 173             | 1.73    | n.a.   | —                                          | —                                                      | Bai et al. (2019) |
| 78  | ARC05  | 12SR12      | 74.00 | 190.98 | 175             | 0.74    | 0.12   | —                                          | —                                                      | Bai et al. (2019) |
| 79  | ARC06  | 14R08       | 74.00 | 191.00 | 83              | 1.27    | n.a.   | —                                          | —                                                      | Bai et al. (2019) |
| 80  | ARC06  | 14R09       | 74.61 | 190.97 | 190             | 0.86    | n.a.   | —                                          | —                                                      | Bai et al. (2019) |
| 81  | ARC03  | 08B11       | 75.00 | 194.97 | 552             | 1.18    | 0.18   | —                                          | —                                                      | Bai et al. (2019) |
| 82  | ARC03  | 08M07       | 75.01 | 188.01 | 394             | 1.11    | 0.19   | —                                          | —                                                      | Bai et al. (2019) |

**Table S1 (continued)**

| Nr. | Cruise | Sample name | Lati. | Long.  | Water Depth (m) | TOC (%) | TN (%) | Chlorophyll <i>a</i> (mg m <sup>-3</sup> ) | Pigment fucoxanthin (ng L <sup>-1</sup> ) <sup>a</sup> | Reference         |
|-----|--------|-------------|-------|--------|-----------------|---------|--------|--------------------------------------------|--------------------------------------------------------|-------------------|
| 83  | ARC06  | 14C13-5     | 75.20 | 200.82 | 942             | 0.75    | n.a.   | —                                          | —                                                      | Bai et al. (2019) |
| 84  | ARC06  | 14R10       | 75.43 | 192.10 | 164             | 0.56    | n.a.   | —                                          | —                                                      | Bai et al. (2019) |
| 85  | ARC06  | 14R11       | 76.15 | 193.80 | 352             | 0.79    | n.a.   | —                                          | —                                                      | Bai et al. (2019) |
| 86  | ARC06  | 14R12       | 77.00 | 196.11 | 439             | 0.50    | n.a.   | —                                          | —                                                      | Bai et al. (2019) |
| 87  | ARC06  | 14R14       | 78.63 | 199.57 | 761             | 0.45    | n.a.   | —                                          | —                                                      | Bai et al. (2019) |
| 88  | ARC06  | 14SIC06     | 79.98 | 207.37 | 3763            | 0.86    | n.a.   | —                                          | —                                                      | Bai et al. (2019) |
| 89  | ARC06  | SPM 14R03   | 68.62 | 191.00 | 54              | —       | —      | 0.50                                       | 76.60                                                  | This study        |
| 90  | ARC06  | SPM 14R05   | 71.00 | 191.00 | 44              | —       | —      | 0.27                                       | 103.98                                                 | This study        |
| 91  | ARC06  | SPM 14R07   | 73.00 | 191.03 | 73              | —       | —      | 5.40                                       | 1380.75                                                | This study        |
| 92  | ARC06  | SPM 14R09   | 74.61 | 190.97 | 190             | —       | —      | 0.26                                       | 57.63                                                  | This study        |
| 93  | ARC06  | SPM 14C11   | 74.78 | 204.74 | 3911            | —       | —      | n.a.                                       | 2.98                                                   | This study        |
| 94  | ARC06  | SPM 14C13   | 75.20 | 200.82 | 942             | —       | —      | n.a.                                       | 3.43                                                   | This study        |
| 95  | ARC06  | SPM 14R10   | 75.43 | 192.10 | 164             | —       | —      | 0.08                                       | 12.62                                                  | This study        |
| 96  | ARC06  | SPM 14R11   | 76.15 | 193.80 | 352             | —       | —      | 0.07                                       | 4.85                                                   | This study        |
| 97  | ARC06  | SPM 14C25   | 76.40 | 210.68 | 3774            | —       | —      | n.a.                                       | 5.60                                                   | This study        |
| 98  | ARC06  | SPM 14R12   | 77.00 | 196.11 | 439             | —       | —      | 0.05                                       | 3.16                                                   | This study        |
| 99  | ARC06  | SPM 14R13   | 77.80 | 198.00 | 2668            | —       | —      | 0.06                                       | 4.24                                                   | This study        |
| 100 | ARC06  | SPM 14R14   | 78.63 | 199.57 | 761             | —       | —      | 0.08                                       | 6.11                                                   | This study        |
| 101 | ARC06  | SPM 14R15   | 79.38 | 200.93 | 3284            | —       | —      | 0.08                                       | 9.68                                                   | This study        |

Note: n.a., not analysed.

<sup>a</sup> Pigments data courtesy of Chinese National Arctic & Antarctic Data Center (CN-NADC).

**Table S2.** Summary of biomarker data in surface sediment across the Bering and Chukchi Sea.

| Nr. | Station | IP <sub>25</sub><br>Relative<br>abundance<br>( $\mu\text{g g}^{-1}$<br>TOC) | HBI-II<br>Relative<br>abundance<br>( $\mu\text{g g}^{-1}$<br>TOC) | HBI-III<br>Relative<br>abundance<br>( $\mu\text{g g}^{-1}$<br>TOC) | Brassicasterol<br>( $\mu\text{g g}^{-1}$<br>TOC) | Dinosterol<br>( $\mu\text{g g}^{-1}$<br>TOC) | Campesterol<br>( $\mu\text{g g}^{-1}$ TOC) | 24-<br>ethylcholest-<br>5-en-3 $\beta$ -ol<br>( $\mu\text{g g}^{-1}$ TOC) | Cholesterol<br>( $\mu\text{g g}^{-1}$<br>TOC) | C <sub>27</sub> +C <sub>29</sub> +C <sub>31</sub><br>( $\mu\text{g g}^{-1}$<br>TOC) | H-Print<br>(%) |
|-----|---------|-----------------------------------------------------------------------------|-------------------------------------------------------------------|--------------------------------------------------------------------|--------------------------------------------------|----------------------------------------------|--------------------------------------------|---------------------------------------------------------------------------|-----------------------------------------------|-------------------------------------------------------------------------------------|----------------|
| 1   | 10B04   | n.d.                                                                        | n.d.                                                              | 0.34                                                               | 1.04                                             | 2.78                                         | 5.25                                       | 4.69                                                                      | 12.08                                         | 43.56                                                                               | 100.00         |
| 2   | 10B06   | 0.08                                                                        | 0.20                                                              | 0.03                                                               | 1.06                                             | 16.73                                        | 10.30                                      | 6.61                                                                      | 4.50                                          | 86.09                                                                               | 9.44           |
| 3   | 08BR07  | 0.14                                                                        | 0.31                                                              | 0.54                                                               | 1.88                                             | 11.91                                        | 18.79                                      | 16.00                                                                     | 15.61                                         | 91.07                                                                               | 54.47          |
| 4   | 14NB02  | 0.08                                                                        | 0.15                                                              | 0.14                                                               | 8.18                                             | 20.61                                        | 104.32                                     | 152.35                                                                    | 674.82                                        | 45.31                                                                               | 37.15          |
| 5   | 10NB01  | 0.05                                                                        | 0.12                                                              | 0.11                                                               | 2.80                                             | 13.20                                        | 20.12                                      | 18.14                                                                     | 18.78                                         | 49.59                                                                               | 37.89          |
| 6   | 10BB01  | 0.34                                                                        | 0.34                                                              | 0.89                                                               | 8.02                                             | 16.13                                        | 44.20                                      | 55.41                                                                     | 196.62                                        | 63.80                                                                               | 56.58          |
| 7   | 10NB02  | 0.15                                                                        | 0.35                                                              | 0.13                                                               | 10.25                                            | 21.17                                        | 48.79                                      | 132.86                                                                    | 79.82                                         | 102.33                                                                              | 20.95          |
| 8   | 08NB19  | 0.08                                                                        | 0.64                                                              | 0.27                                                               | 7.97                                             | 20.93                                        | 36.63                                      | 69.55                                                                     | 210.91                                        | 109.96                                                                              | 26.83          |
| 9   | 10NB03  | 0.09                                                                        | 0.24                                                              | 0.17                                                               | 9.77                                             | 27.61                                        | 38.25                                      | 52.49                                                                     | 73.01                                         | 87.70                                                                               | 34.12          |
| 10  | 08BR14  | 0.09                                                                        | 0.13                                                              | 0.04                                                               | 2.58                                             | 11.63                                        | 13.05                                      | 14.08                                                                     | 11.72                                         | 92.01                                                                               | 16.06          |
| 11  | 08NB17  | 0.12                                                                        | 0.17                                                              | 0.02                                                               | 1.74                                             | 9.23                                         | 6.18                                       | 8.19                                                                      | 16.39                                         | 211.86                                                                              | 4.92           |
| 12  | 14B14   | 0.11                                                                        | 0.07                                                              | 0.04                                                               | 3.74                                             | 20.67                                        | 22.41                                      | 17.58                                                                     | 21.34                                         | 28.49                                                                               | 18.34          |
| 13  | 08NB28  | 0.19                                                                        | 1.35                                                              | 0.71                                                               | 13.11                                            | 36.06                                        | 37.13                                      | 104.15                                                                    | 168.00                                        | 209.31                                                                              | 31.37          |
| 14  | 08NB26  | 0.07                                                                        | 0.37                                                              | 0.05                                                               | 14.20                                            | 12.29                                        | 22.54                                      | 58.93                                                                     | 174.22                                        | 106.50                                                                              | 9.63           |
| 15  | 14B15   | 0.15                                                                        | 0.17                                                              | 0.04                                                               | 12.19                                            | 18.53                                        | 45.73                                      | 39.63                                                                     | 84.05                                         | 43.18                                                                               | 12.04          |
| 16  | 10BB05  | 0.16                                                                        | 0.35                                                              | 0.15                                                               | 10.91                                            | 22.07                                        | 85.63                                      | 44.12                                                                     | 72.73                                         | 66.30                                                                               | 22.29          |
| 17  | 08NB13  | 0.07                                                                        | 0.10                                                              | 0.03                                                               | 2.07                                             | 11.06                                        | 18.26                                      | 13.20                                                                     | 20.07                                         | 74.42                                                                               | 12.58          |
| 18  | 10NB08  | 0.18                                                                        | 0.77                                                              | 0.32                                                               | 31.49                                            | 31.83                                        | 74.75                                      | 121.78                                                                    | 114.99                                        | 119.20                                                                              | 25.51          |
| 19  | 12BM04  | 0.09                                                                        | 0.20                                                              | 0.05                                                               | 4.54                                             | 24.12                                        | 29.46                                      | 27.25                                                                     | 49.00                                         | 85.47                                                                               | 14.51          |

**Table S2 (continued)**

| Nr. | Station | IP <sub>25</sub><br>Relative<br>abundance<br>( $\mu\text{g g}^{-1}$<br>TOC) | HBI-II<br>Relative<br>abundance<br>( $\mu\text{g g}^{-1}$<br>TOC) | HBI-III<br>Relative<br>abundance<br>( $\mu\text{g g}^{-1}$<br>TOC) | Brassicasterol<br>( $\mu\text{g g}^{-1}$<br>TOC) | Dinosterol<br>( $\mu\text{g g}^{-1}$<br>TOC) | Campesterol<br>( $\mu\text{g g}^{-1}$ TOC) | 24-<br>ethylcholest-<br>5-en-3 $\beta$ -ol<br>( $\mu\text{g g}^{-1}$ TOC) | Cholesterol<br>( $\mu\text{g g}^{-1}$<br>TOC) | C <sub>27</sub> +C <sub>29</sub> +C <sub>31</sub><br>( $\mu\text{g g}^{-1}$<br>TOC) | H-Print<br>(%) |
|-----|---------|-----------------------------------------------------------------------------|-------------------------------------------------------------------|--------------------------------------------------------------------|--------------------------------------------------|----------------------------------------------|--------------------------------------------|---------------------------------------------------------------------------|-----------------------------------------------|-------------------------------------------------------------------------------------|----------------|
| 20  | 08NB11  | 0.14                                                                        | 0.20                                                              | 0.03                                                               | 3.59                                             | 8.96                                         | 23.05                                      | 18.39                                                                     | 29.49                                         | 117.21                                                                              | 8.61           |
| 21  | 08NB22  | 0.28                                                                        | 0.52                                                              | 0.12                                                               | 5.59                                             | 15.44                                        | 27.58                                      | 19.04                                                                     | 29.91                                         | 102.86                                                                              | 13.12          |
| 22  | 08NB21  | 0.23                                                                        | 0.43                                                              | 0.26                                                               | 9.26                                             | 8.07                                         | 24.56                                      | 28.90                                                                     | 99.76                                         | 124.83                                                                              | 28.66          |
| 23  | 08BS07  | 0.16                                                                        | 0.26                                                              | 0.05                                                               | 57.67                                            | 35.37                                        | 123.41                                     | 111.54                                                                    | 413.66                                        | 128.73                                                                              | 11.19          |
| 24  | 10SR01  | 0.12                                                                        | 0.29                                                              | 0.08                                                               | 37.56                                            | 34.41                                        | 114.11                                     | 105.54                                                                    | 173.81                                        | 145.24                                                                              | 17.00          |
| 25  | 10SR05  | 0.26                                                                        | 0.57                                                              | 0.15                                                               | 7.74                                             | 38.10                                        | 48.92                                      | 62.79                                                                     | 51.49                                         | 127.27                                                                              | 15.15          |
| 26  | 10R06   | 0.33                                                                        | 0.58                                                              | 0.18                                                               | 6.82                                             | 43.04                                        | 33.83                                      | 49.39                                                                     | 46.18                                         | 79.88                                                                               | 16.20          |
| 27  | 08C23   | 0.43                                                                        | 0.70                                                              | 0.09                                                               | 5.28                                             | 25.81                                        | 20.43                                      | 26.09                                                                     | 32.79                                         | 178.35                                                                              | 7.19           |
| 28  | 08C25   | 0.80                                                                        | 1.01                                                              | 0.07                                                               | 3.64                                             | 26.15                                        | 24.80                                      | 44.16                                                                     | 63.80                                         | 198.43                                                                              | 3.55           |
| 29  | 14C05   | 1.23                                                                        | 1.72                                                              | 0.94                                                               | 36.58                                            | 33.87                                        | 113.39                                     | 130.21                                                                    | 273.99                                        | 118.70                                                                              | 24.24          |
| 30  | 10R08   | 1.04                                                                        | 1.42                                                              | 0.26                                                               | 5.36                                             | 19.56                                        | 24.24                                      | 30.86                                                                     | 55.56                                         | 98.83                                                                               | 9.70           |
| 31  | 10C04   | 0.71                                                                        | 0.79                                                              | 0.09                                                               | 5.87                                             | 30.90                                        | 32.47                                      | 46.97                                                                     | 51.23                                         | 146.47                                                                              | 5.62           |
| 32  | 10S21   | 0.85                                                                        | 1.82                                                              | 0.05                                                               | 11.12                                            | 10.43                                        | 39.37                                      | 125.79                                                                    | 57.79                                         | 68.61                                                                               | 1.82           |
| 33  | 10C09   | 1.02                                                                        | 1.04                                                              | 0.04                                                               | 9.27                                             | 12.27                                        | 54.46                                      | 34.81                                                                     | 47.16                                         | 90.36                                                                               | 2.09           |
| 34  | 10S23   | 0.76                                                                        | 1.55                                                              | 0.05                                                               | 6.17                                             | 9.00                                         | 52.25                                      | 90.63                                                                     | 91.38                                         | 72.01                                                                               | 2.13           |
| 35  | 10R09   | 1.68                                                                        | 3.02                                                              | 0.52                                                               | 8.83                                             | 20.35                                        | 33.16                                      | 25.45                                                                     | 39.80                                         | 60.50                                                                               | 9.90           |
| 36  | 10S25   | 0.34                                                                        | 0.54                                                              | 0.02                                                               | 0.79                                             | 4.52                                         | 12.71                                      | 9.97                                                                      | 3.54                                          | 26.68                                                                               | 2.45           |
| 37  | 10C07   | 0.62                                                                        | 0.95                                                              | 0.13                                                               | 2.12                                             | 5.80                                         | 9.31                                       | 7.62                                                                      | 10.93                                         | 31.83                                                                               | 7.81           |
| 38  | 10S26   | 0.44                                                                        | 0.89                                                              | 0.09                                                               | 2.25                                             | 3.81                                         | 5.24                                       | 10.13                                                                     | 15.42                                         | 80.65                                                                               | 6.49           |

**Table S2 (continued)**

| Nr. | Station | IP <sub>25</sub><br>Relative<br>abundance<br>( $\mu\text{g g}^{-1}$<br>TOC) | HBI-II<br>Relative<br>abundance<br>( $\mu\text{g g}^{-1}$<br>TOC) | HBI-III<br>Relative<br>abundance<br>( $\mu\text{g g}^{-1}$<br>TOC) | Brassicasterol<br>( $\mu\text{g g}^{-1}$<br>TOC) | Dinosterol<br>( $\mu\text{g g}^{-1}$<br>TOC) | Campesterol<br>( $\mu\text{g g}^{-1}$ TOC) | 24-<br>ethylcholest-<br>5-en-3 $\beta$ -ol<br>( $\mu\text{g g}^{-1}$ TOC) | Cholesterol<br>( $\mu\text{g g}^{-1}$<br>TOC) | C <sub>27</sub> +C <sub>29</sub> +C <sub>31</sub><br>( $\mu\text{g g}^{-1}$<br>TOC) | H-Print<br>(%) |
|-----|---------|-----------------------------------------------------------------------------|-------------------------------------------------------------------|--------------------------------------------------------------------|--------------------------------------------------|----------------------------------------------|--------------------------------------------|---------------------------------------------------------------------------|-----------------------------------------------|-------------------------------------------------------------------------------------|----------------|
| 39  | 10SR10  | 1.66                                                                        | 2.21                                                              | 0.09                                                               | 10.34                                            | 14.27                                        | 46.48                                      | 33.88                                                                     | 42.85                                         | 64.90                                                                               | 2.32           |
| 40  | 10MS01  | 0.44                                                                        | 0.71                                                              | 0.01                                                               | 0.72                                             | 0.61                                         | 1.71                                       | 3.01                                                                      | 2.94                                          | n.d.                                                                                | 1.21           |
| 41  | 10SR12  | 0.92                                                                        | 1.06                                                              | 0.16                                                               | 1.78                                             | 3.64                                         | 6.71                                       | 9.33                                                                      | 17.13                                         | 36.20                                                                               | 7.55           |
| 42  | 08B12   | 0.08                                                                        | 0.10                                                              | 0.01                                                               | 2.34                                             | 2.44                                         | 2.37                                       | 2.87                                                                      | 11.39                                         | 127.81                                                                              | 4.97           |
| 43  | 08P31   | n.d.                                                                        | 0.07                                                              | n.d.                                                               | 2.09                                             | 2.32                                         | n.d.                                       | n.d.                                                                      | 2.16                                          | 121.41                                                                              | —              |
| 44  | 10BN03  | 0.26                                                                        | 0.45                                                              | n.d.                                                               | 2.77                                             | 1.42                                         | 2.08                                       | 5.46                                                                      | 8.32                                          | 50.43                                                                               | —              |
| 45  | 10BN04  | 0.56                                                                        | 0.16                                                              | 0.07                                                               | 2.01                                             | 0.64                                         | 3.52                                       | 10.10                                                                     | 0.58                                          | 48.26                                                                               | 8.63           |
| 46  | 08N01   | n.d.                                                                        | n.d.                                                              | n.d.                                                               | 2.83                                             | 2.43                                         | 0.84                                       | 1.32                                                                      | 11.17                                         | 113.76                                                                              | —              |
| 47  | 14SIC03 | 0.11                                                                        | 0.18                                                              | 0.03                                                               | 1.64                                             | 1.56                                         | 1.99                                       | 6.37                                                                      | 9.95                                          | 46.25                                                                               | 8.75           |
| 48  | 10BN06  | n.d.                                                                        | 0.11                                                              | n.d.                                                               | 2.98                                             | 5.10                                         | 1.51                                       | 1.13                                                                      | 9.43                                          | n.d.                                                                                | —              |
| 49  | 08B82   | n.d.                                                                        | n.d.                                                              | n.d.                                                               | 2.20                                             | 0.80                                         | 1.74                                       | 0.95                                                                      | 24.23                                         | 57.69                                                                               | —              |
| 50  | 10BN07  | 0.28                                                                        | 0.06                                                              | 0.09                                                               | 1.34                                             | 0.89                                         | 0.47                                       | 0.67                                                                      | 5.29                                          | 38.33                                                                               | 21.04          |
| 51  | 08B85B  | 0.13                                                                        | 0.13                                                              | n.d.                                                               | 2.89                                             | 3.09                                         | 2.64                                       | 2.30                                                                      | 62.52                                         | 114.77                                                                              | —              |
| 52  | 08B86   | 0.19                                                                        | 0.18                                                              | n.d.                                                               | 2.89                                             | 2.42                                         | 3.98                                       | 2.61                                                                      | 83.80                                         | 105.05                                                                              | —              |
| 53  | 08R01*  | 0.10                                                                        | 0.23                                                              | 0.07                                                               | 6.49                                             | 17.87                                        | 44.92                                      | 33.73                                                                     | 119.46                                        | 123.14                                                                              | 17.86          |
| 54  | 14CC2*  | 0.14                                                                        | 0.24                                                              | 0.07                                                               | 14.46                                            | 14.16                                        | 52.16                                      | 32.78                                                                     | 68.93                                         | 72.46                                                                               | 15.37          |
| 55  | 08R03*  | 0.17                                                                        | 0.28                                                              | 0.10                                                               | 6.53                                             | 18.70                                        | 97.65                                      | 44.03                                                                     | 44.09                                         | 111.70                                                                              | 17.66          |
| 56  | 14CC3*  | 0.23                                                                        | 0.40                                                              | 0.09                                                               | 10.01                                            | 29.58                                        | 38.45                                      | 40.67                                                                     | 65.96                                         | 131.46                                                                              | 12.59          |
| 57  | 14CC4*  | 0.46                                                                        | 0.92                                                              | 0.33                                                               | 13.31                                            | 42.68                                        | 68.52                                      | 96.09                                                                     | 407.12                                        | 102.60                                                                              | 19.25          |

**Table S2 (continued)**

| Nr. | Station | IP <sub>25</sub><br>Relative<br>abundance<br>( $\mu\text{g g}^{-1}$<br>TOC) | HBI-II<br>Relative<br>abundance<br>( $\mu\text{g g}^{-1}$<br>TOC) | HBI-III<br>Relative<br>abundance<br>( $\mu\text{g g}^{-1}$<br>TOC) | Brassicasterol<br>( $\mu\text{g g}^{-1}$<br>TOC) | Dinosterol<br>( $\mu\text{g g}^{-1}$<br>TOC) | Campesterol<br>( $\mu\text{g g}^{-1}$ TOC) | 24-<br>ethylcholest-<br>5-en-3 $\beta$ -ol<br>( $\mu\text{g g}^{-1}$ TOC) | Cholesterol<br>( $\mu\text{g g}^{-1}$<br>TOC) | C <sub>27</sub> +C <sub>29</sub> +C <sub>31</sub><br>( $\mu\text{g g}^{-1}$<br>TOC) | H-Print<br>(%) |
|-----|---------|-----------------------------------------------------------------------------|-------------------------------------------------------------------|--------------------------------------------------------------------|--------------------------------------------------|----------------------------------------------|--------------------------------------------|---------------------------------------------------------------------------|-----------------------------------------------|-------------------------------------------------------------------------------------|----------------|
| 58  | 12CC6*  | 0.26                                                                        | 0.51                                                              | 0.03                                                               | 5.26                                             | 24.96                                        | 12.01                                      | 55.64                                                                     | 33.84                                         | 81.44                                                                               | 4.28           |
| 59  | 14CC6*  | 0.83                                                                        | 1.58                                                              | 0.54                                                               | 15.17                                            | 48.00                                        | 36.70                                      | 82.20                                                                     | 162.39                                        | 138.54                                                                              | 18.21          |
| 60  | 14R03*  | 0.11                                                                        | 0.15                                                              | 0.04                                                               | 3.37                                             | 20.90                                        | 43.68                                      | 37.38                                                                     | 35.10                                         | 59.74                                                                               | 12.30          |
| 61  | 08C35*  | 0.71                                                                        | 1.41                                                              | 0.08                                                               | 2.88                                             | 18.20                                        | 13.45                                      | 48.16                                                                     | 69.54                                         | 53.97                                                                               | 3.57           |
| 62  | 08C33*  | 0.09                                                                        | 0.15                                                              | 0.01                                                               | 2.21                                             | 7.92                                         | 4.93                                       | 9.20                                                                      | 9.65                                          | 100.61                                                                              | 5.24           |
| 63  | 14C03*  | 0.25                                                                        | 0.42                                                              | 0.02                                                               | 4.25                                             | 14.32                                        | 11.41                                      | 41.33                                                                     | 42.95                                         | 47.48                                                                               | 2.54           |
| 64  | 14C01*  | 0.20                                                                        | 0.36                                                              | 0.07                                                               | 3.21                                             | 16.93                                        | 13.71                                      | 25.39                                                                     | 23.21                                         | 65.84                                                                               | 10.98          |
| 65  | 08R09*  | 0.38                                                                        | 0.43                                                              | 0.06                                                               | 1.91                                             | 26.39                                        | 21.95                                      | 14.69                                                                     | 24.72                                         | 130.85                                                                              | 6.90           |
| 66  | 14C04*  | 0.42                                                                        | 0.35                                                              | 0.04                                                               | 16.71                                            | 18.08                                        | 23.13                                      | 29.18                                                                     | 56.09                                         | 53.98                                                                               | 4.47           |
| 67  | 08C19*  | 0.91                                                                        | 0.96                                                              | 0.04                                                               | 3.22                                             | 13.02                                        | 19.94                                      | 17.41                                                                     | 22.22                                         | 126.21                                                                              | 2.34           |
| 68  | 08C17*  | 1.01                                                                        | 1.26                                                              | 0.06                                                               | 2.79                                             | 12.04                                        | 14.88                                      | 12.14                                                                     | 34.01                                         | 124.11                                                                              | 2.52           |
| 69  | 14S01*  | 4.39                                                                        | 4.46                                                              | 0.15                                                               | 24.17                                            | 40.13                                        | 77.68                                      | 75.31                                                                     | 168.08                                        | 82.21                                                                               | 1.68           |
| 70  | 08C13*  | 2.10                                                                        | 2.85                                                              | 0.31                                                               | 3.48                                             | 19.17                                        | 33.44                                      | 32.01                                                                     | 40.10                                         | 127.18                                                                              | 5.97           |
| 71  | 14S02*  | 0.28                                                                        | 0.37                                                              | 0.12                                                               | 0.28                                             | 1.11                                         | 4.48                                       | 3.28                                                                      | 3.84                                          | 11.67                                                                               | 15.93          |
| 72  | 08R11*  | 0.57                                                                        | 0.69                                                              | n.d.                                                               | 1.77                                             | 22.54                                        | 21.27                                      | 15.77                                                                     | 22.64                                         | 115.84                                                                              | —              |
| 73  | 14S03*  | 1.61                                                                        | 2.21                                                              | 0.91                                                               | 1.97                                             | 7.08                                         | 13.72                                      | 15.68                                                                     | 14.90                                         | 34.66                                                                               | 19.12          |
| 74  | 08S13*  | 0.14                                                                        | 0.25                                                              | n.d.                                                               | 2.87                                             | 6.91                                         | 4.20                                       | 6.35                                                                      | 11.33                                         | 55.91                                                                               | —              |
| 75  | 14R07*  | 1.08                                                                        | 1.01                                                              | 0.05                                                               | 12.53                                            | 9.38                                         | 38.80                                      | 22.16                                                                     | 55.83                                         | 54.46                                                                               | 2.11           |
| 76  | 08S14*  | 0.09                                                                        | 0.13                                                              | n.d.                                                               | 0.92                                             | 2.36                                         | 0.94                                       | 1.20                                                                      | 9.53                                          | 67.58                                                                               | —              |

39

**Table S2 (continued)**

| Nr. | Station  | IP <sub>25</sub><br>Relative<br>abundance<br>( $\mu\text{g g}^{-1}$<br>TOC) | HBI-II<br>Relative<br>abundance<br>( $\mu\text{g g}^{-1}$<br>TOC) | HBI-III<br>Relative<br>abundance<br>( $\mu\text{g g}^{-1}$<br>TOC) | Brassicasterol<br>( $\mu\text{g g}^{-1}$<br>TOC) | Dinosterol<br>( $\mu\text{g g}^{-1}$<br>TOC) | Campesterol<br>( $\mu\text{g g}^{-1}$ TOC) | 24-<br>ethylcholest-<br>5-en-3 $\beta$ -ol<br>( $\mu\text{g g}^{-1}$ TOC) | Cholesterol<br>( $\mu\text{g g}^{-1}$<br>TOC) | C <sub>27</sub> +C <sub>29</sub> +C <sub>31</sub><br>( $\mu\text{g g}^{-1}$<br>TOC) | H-Print<br>(%) |
|-----|----------|-----------------------------------------------------------------------------|-------------------------------------------------------------------|--------------------------------------------------------------------|--------------------------------------------------|----------------------------------------------|--------------------------------------------|---------------------------------------------------------------------------|-----------------------------------------------|-------------------------------------------------------------------------------------|----------------|
| 77  | 08R15*   | 0.18                                                                        | 0.63                                                              | n.d.                                                               | 0.94                                             | 2.60                                         | 2.92                                       | 2.26                                                                      | 8.01                                          | 14.90                                                                               | —              |
| 78  | 12SR12*  | 0.44                                                                        | 1.26                                                              | 0.10                                                               | 2.24                                             | 6.09                                         | 5.15                                       | 9.09                                                                      | 8.05                                          | 82.31                                                                               | 5.66           |
| 79  | 14R08*   | 0.39                                                                        | 0.46                                                              | 0.04                                                               | 0.40                                             | 2.09                                         | 6.00                                       | 4.52                                                                      | 6.60                                          | 13.31                                                                               | 4.92           |
| 80  | 14R09*   | 0.22                                                                        | 0.32                                                              | 0.04                                                               | 0.74                                             | 2.30                                         | 2.70                                       | 4.98                                                                      | 15.78                                         | 35.60                                                                               | 6.52           |
| 81  | 08B11*   | 0.09                                                                        | 0.12                                                              | n.d.                                                               | 0.67                                             | 1.30                                         | 0.99                                       | 1.59                                                                      | 5.54                                          | 52.33                                                                               | —              |
| 82  | 08M07*   | 0.17                                                                        | 0.22                                                              | n.d.                                                               | 1.36                                             | 1.79                                         | 0.98                                       | 1.92                                                                      | 7.23                                          | 43.09                                                                               | —              |
| 83  | 14C13-5* | 0.12                                                                        | 0.30                                                              | n.d.                                                               | 1.12                                             | 0.90                                         | 1.34                                       | 2.22                                                                      | 9.30                                          | 22.35                                                                               | —              |
| 84  | 14R10*   | 0.14                                                                        | 0.20                                                              | n.d.                                                               | 1.36                                             | 3.10                                         | 2.62                                       | 4.33                                                                      | 5.13                                          | 37.02                                                                               | —              |
| 85  | 14R11*   | 0.09                                                                        | 0.17                                                              | n.d.                                                               | 1.07                                             | 1.14                                         | 1.05                                       | 2.06                                                                      | 4.69                                          | 34.85                                                                               | —              |
| 86  | 14R12*   | 0.09                                                                        | 0.12                                                              | n.d.                                                               | 3.10                                             | 1.37                                         | 1.74                                       | 4.63                                                                      | 8.92                                          | 78.52                                                                               | —              |
| 87  | 14R14*   | 0.14                                                                        | 0.27                                                              | n.d.                                                               | 2.71                                             | 2.45                                         | 1.47                                       | 2.61                                                                      | 5.98                                          | 41.13                                                                               | —              |
| 88  | 14SIC06* | 0.14                                                                        | 0.24                                                              | n.d.                                                               | 0.87                                             | 0.99                                         | 1.30                                       | 3.00                                                                      | 3.79                                          | 70.64                                                                               | —              |

Note: n. d., not detected; \* HBIs data from Bai et al. (2019).

40

41



42 **Table S3.** Summary of biomarker data in SPM from the Chukchi Sea.

| Nr. | Station   | Brassicasterol<br>(ng L <sup>-1</sup> ) | Dinosterol<br>(ng L <sup>-1</sup> ) | 24-<br>ethylcholest-5-<br>en-3 $\beta$ -ol<br>(ng L <sup>-1</sup> ) | Cholesterol<br>(ng L <sup>-1</sup> ) |
|-----|-----------|-----------------------------------------|-------------------------------------|---------------------------------------------------------------------|--------------------------------------|
| 1   | SPM 14R03 | 53.65                                   | 10.51                               | 15.67                                                               | 40.72                                |
| 2   | SPM 14R05 | 13.57                                   | 11.69                               | 9.84                                                                | 19.87                                |
| 3   | SPM 14R07 | 132.31                                  | 17.11                               | 46.04                                                               | 117.29                               |
| 4   | SPM 14R09 | 6.38                                    | 3.47                                | 16.25                                                               | 11.52                                |
| 5   | SPM 14C11 | 1.55                                    | 1.23                                | 4.26                                                                | 3.00                                 |
| 6   | SPM 14C13 | 4.05                                    | 0.72                                | 1.98                                                                | 1.20                                 |
| 7   | SPM 14R10 | 0.92                                    | 0.91                                | 2.69                                                                | 2.17                                 |
| 8   | SPM 14R11 | 1.67                                    | 1.88                                | 3.11                                                                | 5.57                                 |
| 9   | SPM 14C25 | 0.97                                    | 1.27                                | 2.53                                                                | 3.54                                 |
| 10  | SPM 14R12 | 0.80                                    | 1.23                                | 1.88                                                                | 1.47                                 |
| 11  | SPM 14R13 | 2.26                                    | 1.46                                | 4.61                                                                | 2.63                                 |
| 12  | SPM 14R14 | 3.36                                    | 0.96                                | 5.47                                                                | 6.93                                 |
| 13  | SPM 14R15 | 1.00                                    | 0.51                                | 4.05                                                                | 5.39                                 |

43
